# Supplementary material
Source: Springer Nature journal article supplement (https://www.springermedizin.de/resource/supplementary/13256_2011_2148_MOESM3_ESM.pdf/9649088)
Supplement: MOESM3 [file 9649088]

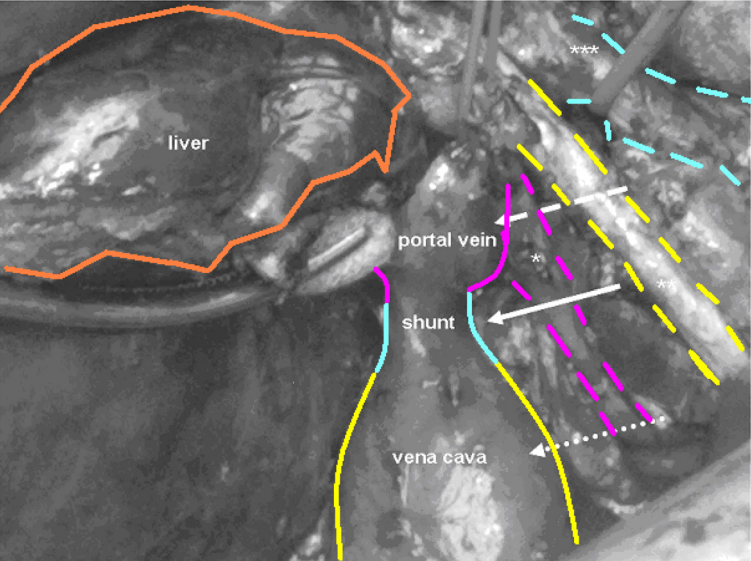

- Outline of vena cava
- Outline of shunt
- Outline of portal vein
- Outline of aberrant hepatic artery
- Outline of common bile duct
- Outline of common hepatic artery
- Outline of the liver
